# Supplementary material for: Simple Expression Domains Are Regulated by Discrete CRMs During Drosophila Oogenesis
Source: PubMed Central journal article supplement (PMC5555475; doi:10.1534/g3.117.043810), 2017-06-20
Supplement: 2705FigureS3.pdf [file 2705FigureS3.pdf]

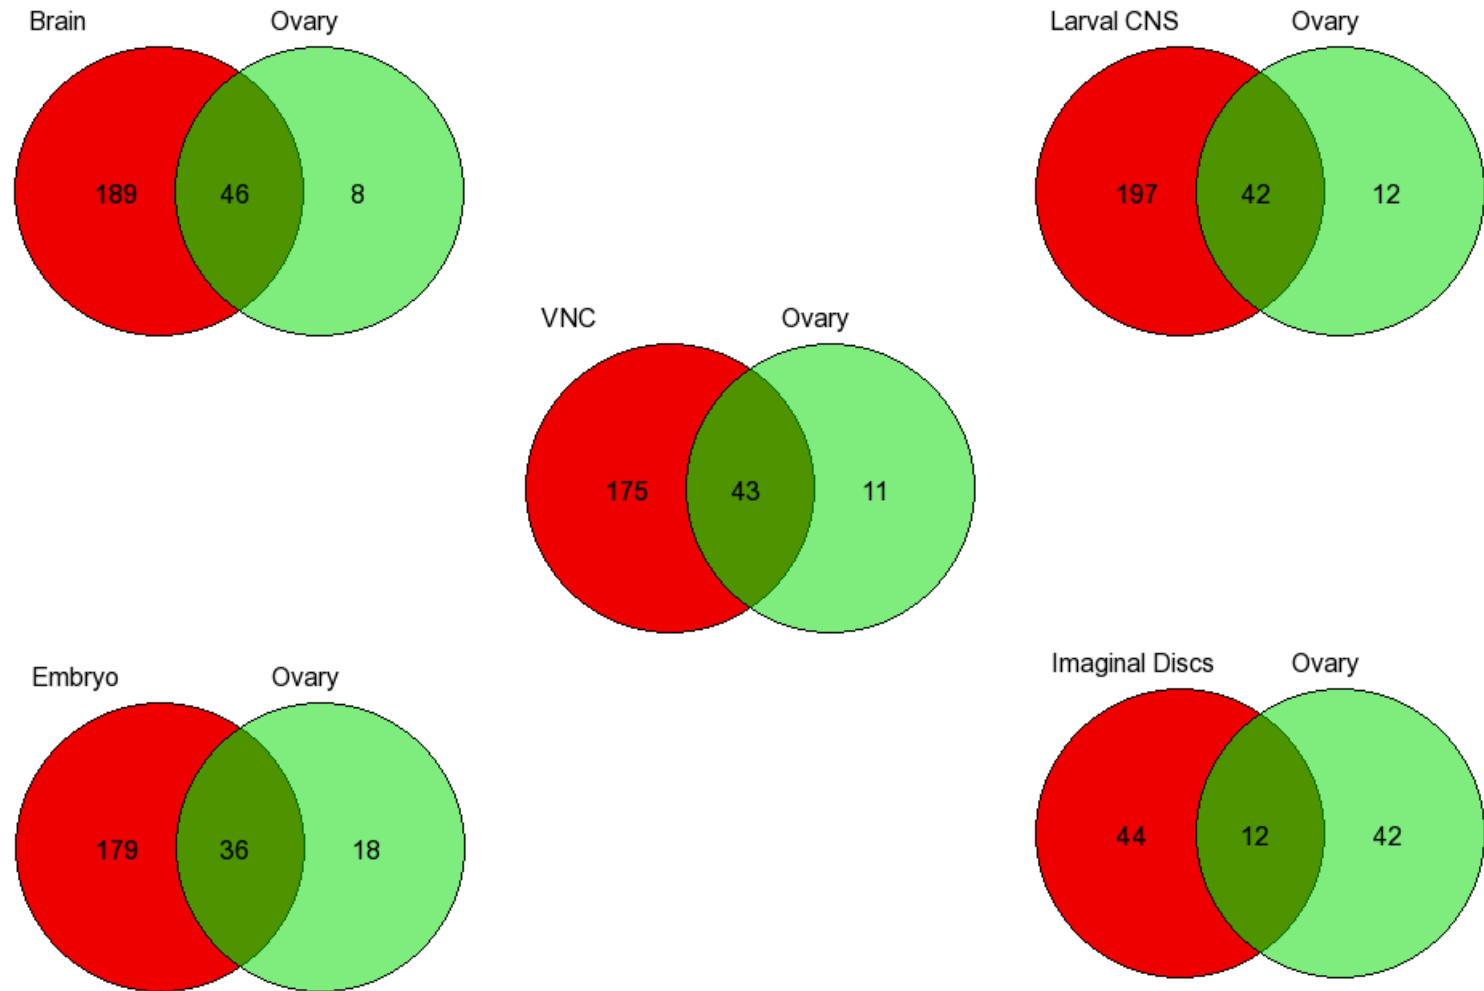

**Figure S3:** Venn diagram showing the overlap number of lines between the ovary and other tissues. Venn diagrams generated by <http://genevenn.sourceforge.net>.

Expression patterns for brain, ventral nerve cord (VNC) embryo, larval CNS, and imaginal discs can be found at: <http://flweb.janelia.org/cgi-bin/flew.cgi> (Jenett et al., 2012, Manning et al., 2012, Li et al., 2014, Jory et al., 2012)
